# Supplementary material for: Stability and Activity of the Antimicrobial Peptide Leg1 in Solution and on Meat and Its Optimized Generation from Chickpea Storage Protein
Source: MDPI journal article supplement (doi:10.3390/foods10061192), 2021-05-25
Supplement: s1 [file s1]

# Stability and Activity of the Antimicrobial Peptide Leg1 in Solution and on Meat and Its Optimized Generation from Chickpea Storage Protein

Marie-Louise Heymich, Showmika Srirangan and Monika Pischetsrieder \*

<sup>1</sup> Chair of Food Chemistry, Department of Chemistry and Pharmacy, Friedrich-Alexander Universität Erlangen-Nürnberg (FAU), Nikolaus-Fiebiger-Str. 10, 91058 Erlangen, Germany; [marie-louise.heylich@fau.de](mailto:marie-louise.heylich@fau.de); [showmika.srirangan@fau.de](mailto:showmika.srirangan@fau.de); [monika.pischetsrieder@fau.de](mailto:monika.pischetsrieder@fau.de)

\* Correspondence: [monika.pischetsrieder@fau.de](mailto:monika.pischetsrieder@fau.de); Tel.: 0049-9131-85-65592

**Table S1.** Antimicrobial activity of sodium trifluoroacetate, sodium acetate and sodium chloride against *E. coli* and *B. subtilis* displayed as minimum inhibitory concentration (MIC) in  $\mu\text{M}$ .

|                         | Counter-ion                      | MIC ( $\mu\text{M}$ ) |                    |
|-------------------------|----------------------------------|-----------------------|--------------------|
|                         |                                  | <i>E. coli</i>        | <i>B. subtilis</i> |
| Sodium trifluoroacetate | TFA <sup>-</sup>                 | > 1000                | > 1000             |
| Sodium acetate          | CH <sub>3</sub> COO <sup>-</sup> | > 1000                | > 1000             |
| Sodium chloride         | Cl <sup>-</sup>                  | > 1000                | > 1000             |

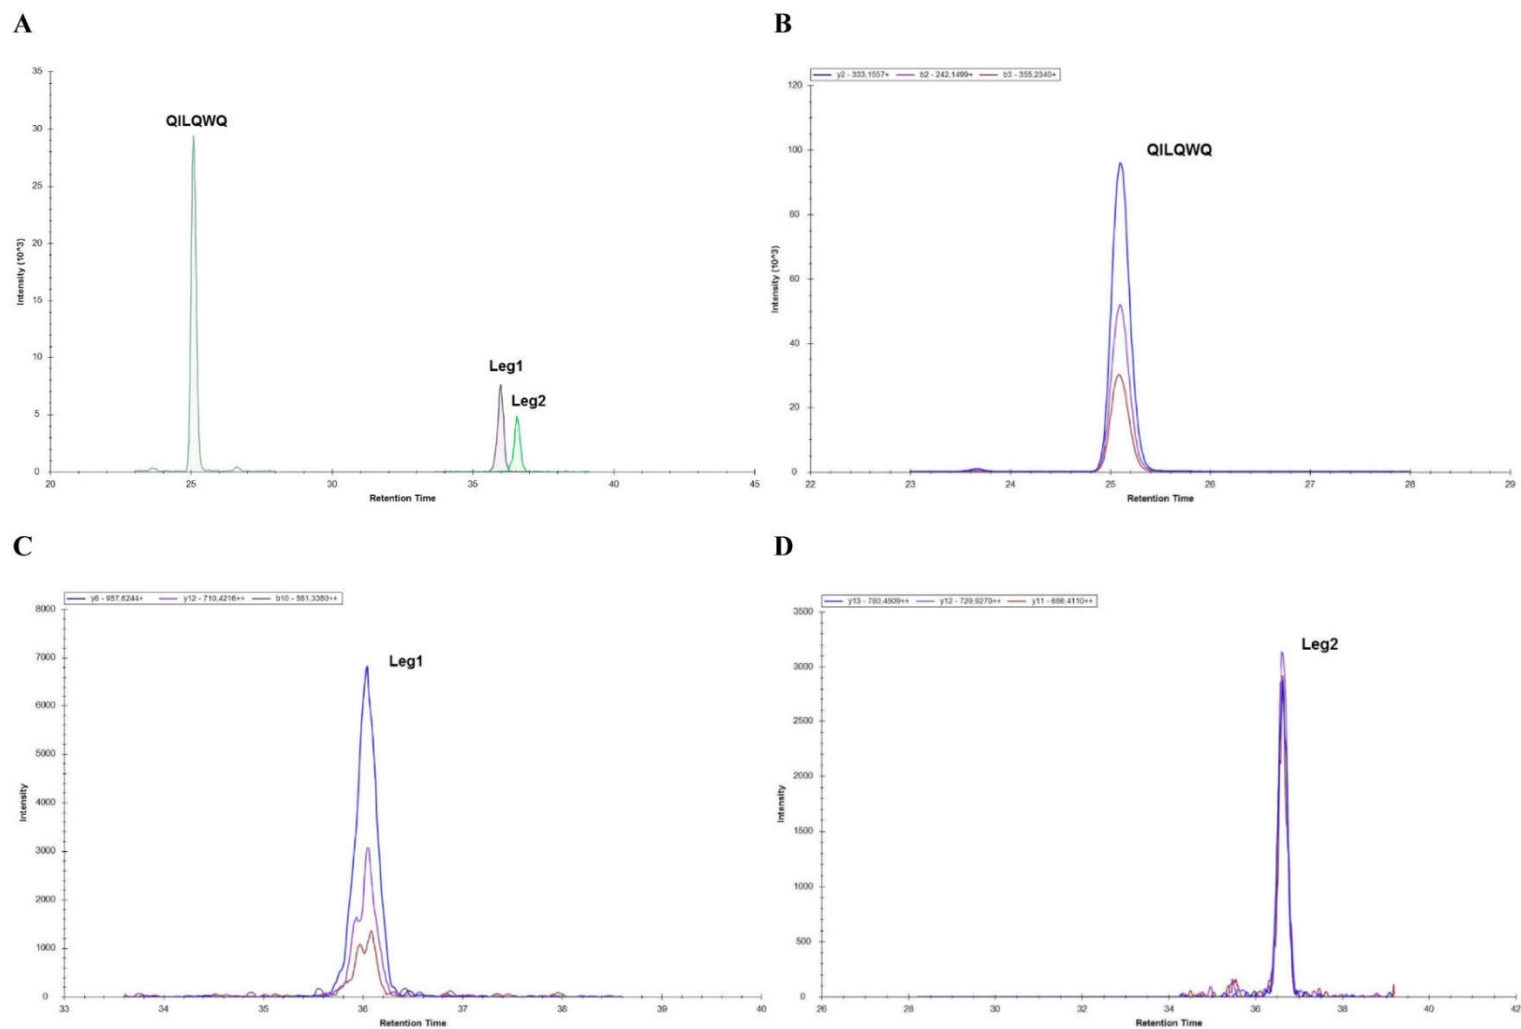

**Figure S1.** Relative quantification of Leg1 and Leg2 in chymotryptic hydrolysates of the chickpea globulin fraction by ultrahigh-performance liquid chromatography–tandem mass spectrometry in scheduled reaction monitoring mode (UHPLC–MS/MS–sMRM): A) Representative Chromatogram of a hydrolysate (4h incubation) and the three MRM transitions of B) QILQWQ (internal standard peptide), C) Leg1, and D) Leg2 as described in Table 1.
